# Supplementary material for: The effects of an invasive seaweed on native communities vary along a gradient of land-based human impacts
Source: PeerJ. 2016 Mar 21;4:e1795. doi: 10.7717/peerj.1795 (PMC4806595; doi:10.7717/peerj.1795)
Supplement: Supplemental Information 2 [file peerj-04-1795-s002.xlsx]

## Sheet: lmmvariables_removalOK
Site	caulerpa	total cover	species richness	land-score	sea-score	canopy algae	invertebrates	turf alga	encrusting algae
Livorno	removed	77	2	4.23444	5.07237	0	0	73	0
Livorno	removed	79	4	4.23444	5.07237	0	0	68	9
Livorno	removed	87	3	4.23444	5.07237	0	0	82	2
Livorno	removed	86	4	4.23444	5.07237	0	0	74	8
Livorno	removed	98	4	4.23444	5.07237	0	0	92	1
Livorno	present	84	6	4.23444	5.07237	0	0	69	10
Livorno	present	89	5	4.23444	5.07237	0	0	65	20
Livorno	present	100	4	4.23444	5.07237	0	0	87	11
Livorno	present	83	5	4.23444	5.07237	0	0	78	0
Livorno	present	76	4	4.23444	5.07237	0	0	59	9
Castiglioncello	removed	98	4	3.7712	4.66774	0	0	68	0
Castiglioncello	removed	97	11	3.7712	4.66774	0	4	54	2
Castiglioncello	removed	91	7	3.7712	4.66774	0	0	66	4
Castiglioncello	removed	92	6	3.7712	4.66774	0	0	44	0
Castiglioncello	removed	98	6	3.7712	4.66774	0	0	51	0
Castiglioncello	present	89	8	3.7712	4.66774	0	0	55	2
Castiglioncello	present	81	7	3.7712	4.66774	0	0	50	2
Castiglioncello	present	88	5	3.7712	4.66774	0	0	66	6
Castiglioncello	present	59	7	3.7712	4.66774	0	0	27	2
Castiglioncello	present	72	9	3.7712	4.66774	0	3	42	5
Quercianella	removed	100	7	3.9081	4.18398	0	0	68	1
Quercianella	removed	98	11	3.9081	4.18398	0	0	56	8
Quercianella	removed	99	9	3.9081	4.18398	0	0	72	4
Quercianella	removed	102.5	12	3.9081	4.18398	0	1	74	1.5
Quercianella	removed	92	8	3.9081	4.18398	0	0	69	6
Quercianella	present	85	12	3.9081	4.18398	0	2	11	18
Quercianella	present	115.5	12	3.9081	4.18398	0	1	52	4
Quercianella	present	82	12	3.9081	4.18398	0	6	29	7
Quercianella	present	85.5	15	3.9081	4.18398	0	2.5	57	12
Quercianella	present	175	12	3.9081	4.18398	0	0	72	45
Fortullino	removed	99	12	3.59015	4.21416	0	1	48	21
Fortullino	removed	96	11	3.59015	4.21416	0	1	52	15
Fortullino	removed	99	9	3.59015	4.21416	0	2	69	8
Fortullino	removed	99	6	3.59015	4.21416	0	0	75	0
Fortullino	removed	97	8	3.59015	4.21416	0	4	63	6
Fortullino	present	89	7	3.59015	4.21416	0	1	15	60
Fortullino	present	86	10	3.59015	4.21416	0	2	15	41
Fortullino	present	86	9	3.59015	4.21416	0	1	20	37
Fortullino	present	89	6	3.59015	4.21416	0	0	41	0
Fortullino	present	88	9	3.59015	4.21416	0	0	66	8
Capraia	removed	110	17	0.00695417	4.50742	38	8	18	29.5
Capraia	removed	85	19	0.00695417	4.50742	14	7	26.5	15.5
Capraia	removed	93	19	0.00695417	4.50742	11	4.5	16	32
Capraia	removed	132	24	0.00695417	4.50742	7	30	23	32
Capraia	removed	148.5	20	0.00695417	4.50742	1	6.5	36	65
Capraia	present	86.5	18	0.00695417	4.50742	31.5	9	18	15.5
Capraia	present	103.5	20	0.00695417	4.50742	7	10.5	42	19
Capraia	present	184	16	0.00695417	4.50742	39	4	44	36
Capraia	present	108.5	16	0.00695417	4.50742	4	2.5	33	28
Capraia	present	147.5	17	0.00695417	4.50742	20	14	25	52
elba	removed	97.5	12	2.08782	3.79453	7	3	54	22
elba	removed	87.5	11	2.08782	3.79453	5	0	60	13
elba	removed	112.5	15	2.08782	3.79453	3	0.5	74	17
elba	removed	83	13	2.08782	3.79453	3	3	26	26
elba	removed	100	9	2.08782	3.79453	0	1	85	1
elba	present	93	12	2.08782	3.79453	0	0	67	12
elba	present	91	10	2.08782	3.79453	0	1	71	12
elba	present	98.5	14	2.08782	3.79453	0	0.5	65.5	24
elba	present	91	11	2.08782	3.79453	0	2	67	12
elba	present	92	11	2.08782	3.79453	0	1	78	3
Plemmirio	removed	50	12	3.03143	5.17323	0	7	24	6.5
Plemmirio	removed	85.5	9	3.03143	5.17323	0	0.5	24.5	9
Plemmirio	removed	103	11	3.03143	5.17323	0	18.5	19.5	38
Plemmirio	removed	79	10	3.03143	5.17323	0	1.5	15	10.5
Plemmirio	removed	84	9	3.03143	5.17323	0	0.5	60	10.5
Plemmirio	present	68.5	8	3.03143	5.17323	0	0.5	9	3.5
Plemmirio	present	70	9	3.03143	5.17323	0	2	5	13.5
Plemmirio	present	39.5	7	3.03143	5.17323	0	2	22	6.5
Plemmirio	present	63.5	9	3.03143	5.17323	0	1	36.5	4.5
Plemmirio	present	72.5	5	3.03143	5.17323	0	0	6	4
Vrsar	removed	93	7	3.038	4.48407	4	0	55	0
Vrsar	removed	79	9	3.038	4.48407	17	0	11	3
Vrsar	removed	105	8	3.038	4.48407	23	0	34	0
Vrsar	removed	83	7	3.038	4.48407	9	0	16	0
Vrsar	removed	96	10	3.038	4.48407	13	0	70	2
Vrsar	present	78	5	3.038	4.48407	6	0	0	0
Vrsar	present	61	6	3.038	4.48407	26	0	20	0
Vrsar	present	47	5	3.038	4.48407	3	0	33	0
Vrsar	present	20	5	3.038	4.48407	2	0	12	0
Vrsar	present	35	4	3.038	4.48407	2	0	8	0
